# Supplementary material for: Landscape simplification filters species traits and drives biotic homogenization
Source: PubMed Central journal article supplement (PMC4634213; doi:10.1038/ncomms9568), 2015-10-20
Supplement: ncomms9568-s1.pdf [file ncomms9568-s1.pdf]

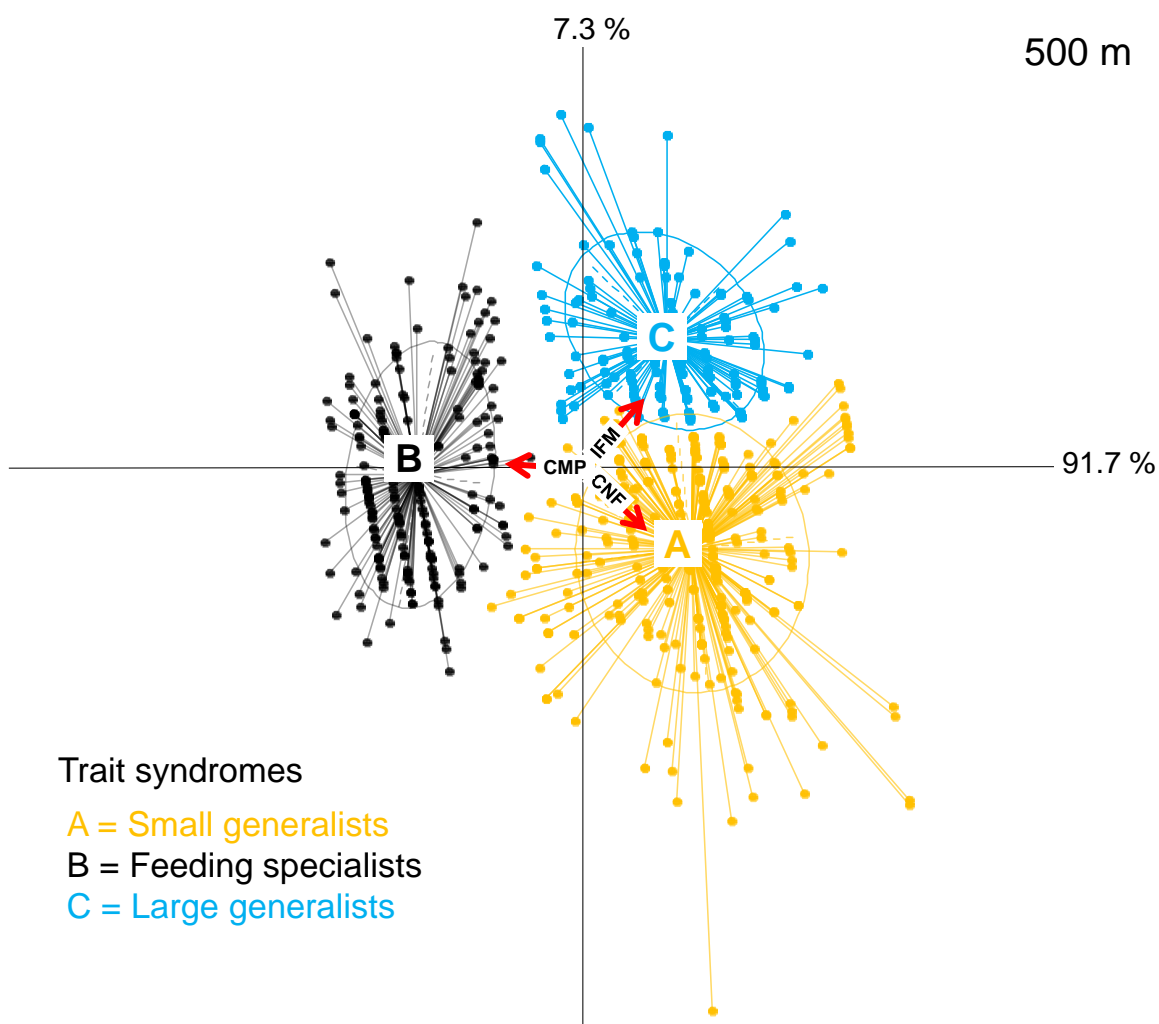

**Supplementary Fig. 1 | Fullscale rendering of Figure 3 presented in main text.** Trait responses to in-field management practices (IFM) and landscape variables (CNF=configurational landscape heterogeneity or patch size and CMP=compositional landscape heterogeneity or diversity of land cover types) within 500 m radius. RLQ biplot, showing the decomposition of co-correlations between environmental variables (R-Table 3x72) and trait attributes (Q-Table 598x4), constrained by abundance (L-Table 72x598). The size and direction of environmental effects is represented by red arrows. Clustered points identify trait syndrome groups and are represented with the same colour.

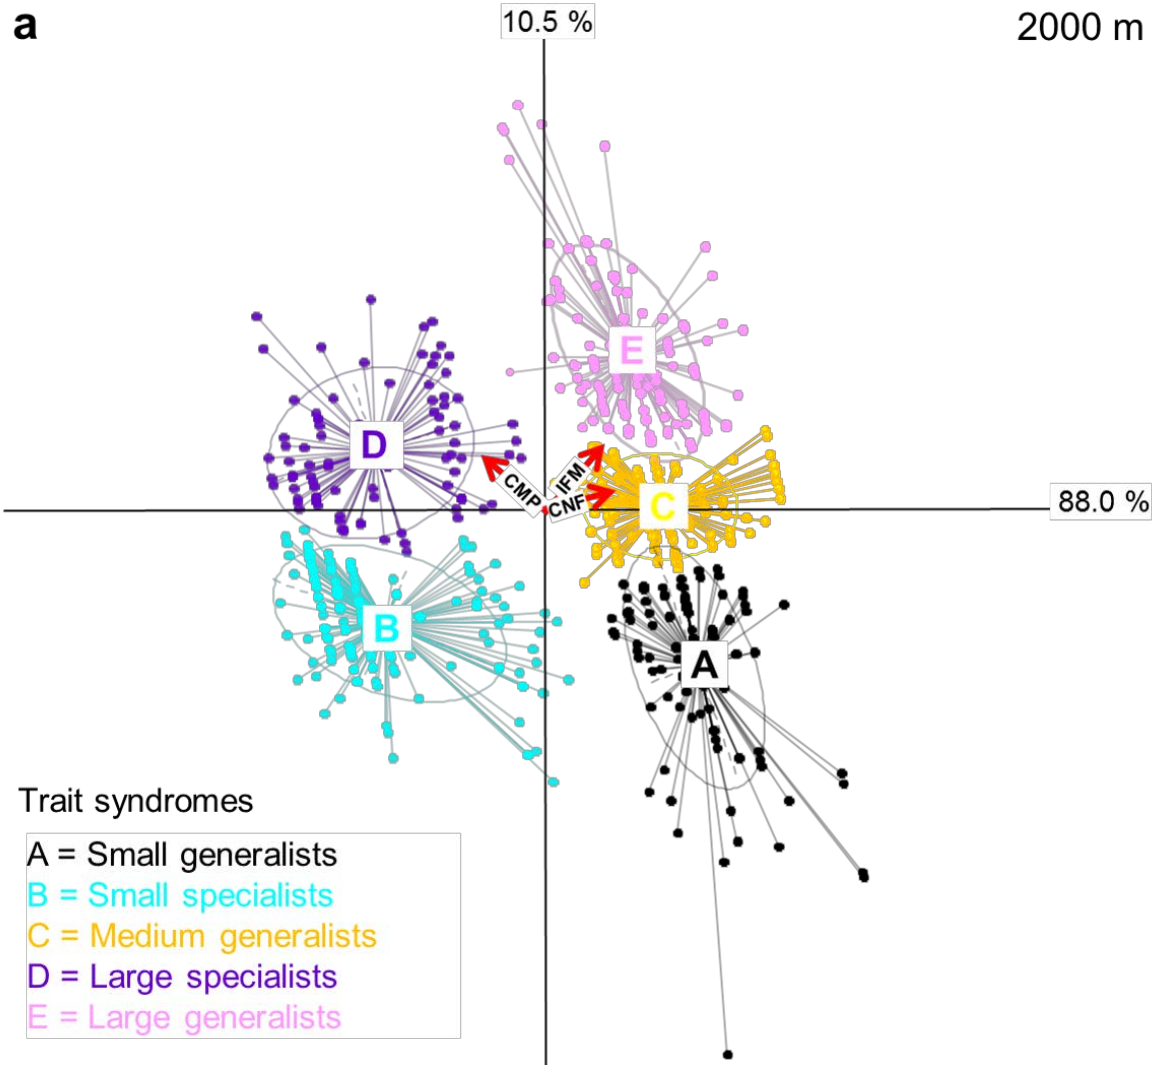

**Supplementary Fig. 2 | Fullscale rendering of Figure 4 presented in main text.** Trait responses to in-field management practices (IFM) and landscape variables (CNF=configurational landscape heterogeneity or patch size and CMP=compositional landscape heterogeneity or diversity of land cover types) within 2000 m radius. RLQ biplot, showing the decomposition of co-correlations between environmental variables (R-Table 3x72) and trait attributes (Q-Table 598x4), constrained by abundance (L-Table 72x598). The size and direction of environmental

effects is represented by red arrows. Clustered points identify trait syndrome groups and are represented with the same colour.

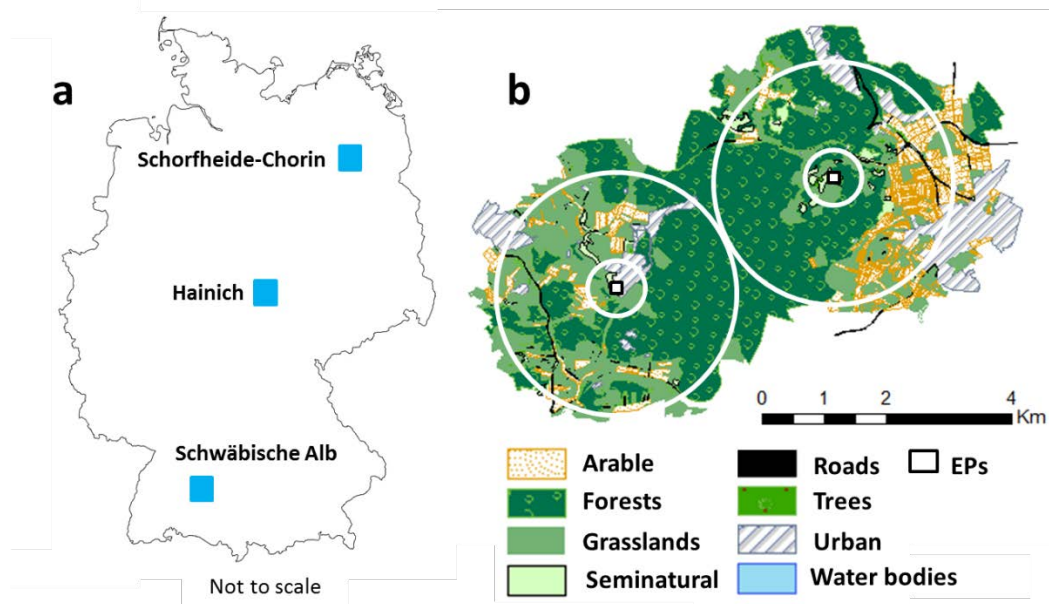

**Supplementary Fig. 3 | Study regions and land cover type categories in landscapes surrounding grasslands.** A total of 72 managed grasslands were sampled for arthropods across three regions in Germany (**a**). All land cover types surrounding each grassland EP (experimental plot) (**b**) were identified and mapped at 500 and 2000 m radii (represented with white circles) to calculate landscape metrics.

**Supplementary Table 1 | Summary of distance between pairs of sites within each study**

| <b>Region</b>      | <b>Distance (km)</b> |             |                | <b>% &lt; 1 km<sup>*</sup></b> |
|--------------------|----------------------|-------------|----------------|--------------------------------|
|                    | <b>Minimum</b>       | <b>Mean</b> | <b>Maximum</b> |                                |
| Schorfheide-Chorin | 0.270                | 12.520      | 28.110         | 6.7                            |
| Hainich-Dün        | 0.308                | 16.580      | 37.290         | 2.7                            |
| Schwäbische Alb    | 0.342                | 7.731       | 23.920         | 3.8                            |

<sup>\*</sup>Percentage of pairs of sites separated by less than 1 km

**Supplementary Table 2 | XY-coordinates of the 72 selected grasslands (EP) (from 150 initial experimental plots) in the three regions. Values represent Gauss Krueger coordinates.**

| <b>1. Schorfheide-Chorin</b> |          |          | <b>2. Hainich-Dün</b> |          |          | <b>3. Schwäbische Alb</b> |          |          |
|------------------------------|----------|----------|-----------------------|----------|----------|---------------------------|----------|----------|
| <b>EP</b>                    | <b>X</b> | <b>Y</b> | <b>EP</b>             | <b>X</b> | <b>Y</b> | <b>EP</b>                 | <b>X</b> | <b>Y</b> |
| 1                            | 543110.0 | 588440.0 | 2                     | 438990.0 | 565290.0 | 1                         | 352540.0 | 536230.0 |
| 2                            | 543180.0 | 588460.0 | 5                     | 438290.1 | 567699.9 | 2                         | 353510.0 | 536000.0 |
| 3                            | 543220.0 | 588610.0 | 6                     | 438769.8 | 567678.5 | 3                         | 353949.0 | 536359.0 |
| 4                            | 543330.0 | 588730.0 | 7                     | 438918.0 | 568328.0 | 5                         | 353260.0 | 536210.0 |
| 6                            | 540789.9 | 588657.9 | 8                     | 438970.0 | 568301.0 | 6                         | 353278.0 | 536270.0 |
| 8                            | 543432.0 | 588731.0 | 9                     | 438699.1 | 567779.8 | 7                         | 352798.5 | 536158.0 |
| 9                            | 540720.0 | 588600.1 | 11                    | 439239.0 | 568400.0 | 8                         | 353650.0 | 536510.0 |
| 10                           | 543300.0 | 588651.0 | 17                    | 439290.0 | 566060.0 | 9                         | 353731.0 | 536199.5 |
| 11                           | 543269.1 | 588640.0 | 19                    | 439310.0 | 566090.0 | 10                        | 351990.0 | 536180.0 |
| 14                           | 543181.0 | 588430.0 | 29                    | 439530.0 | 568209.7 | 12                        | 352601.5 | 536131.5 |
| 16                           | 543312.1 | 588750.1 | 33                    | 438987.9 | 566521.9 | 13                        | 352690.0 | 536160.0 |
| 23                           | 543490.0 | 588660.0 | 34                    | 438739.7 | 567672.0 | 18                        | 353870.0 | 536070.0 |
| 24                           | 543288.0 | 588500.0 | 36                    | 439560.0 | 565619.8 | 22                        | 353809.0 | 536308.0 |
| 25                           | 540759.0 | 588737.9 | 37                    | 439590.1 | 565629.7 | 25                        | 351930.0 | 536199.5 |
| 28                           | 543355.0 | 588500.0 | 38                    | 438397.9 | 566587.9 | 26                        | 352998.5 | 536200.0 |
| 29                           | 543305.1 | 588470.0 | 39                    | 438431.9 | 566631.9 | 27                        | 353560.0 | 536470.5 |
| 30                           | 542190.0 | 589130.0 | 40                    | 439100.0 | 564910.0 | 32                        | 536990.0 | 536500.0 |
| 31                           | 542222.0 | 589140.0 | 43                    | 439102.0 | 568640.0 | 33                        | 353640.0 | 536830.0 |
| 32                           | 542200.1 | 589172.0 | 46                    | 441299.8 | 567539.9 | 34                        | 353710.0 | 536880.0 |
| 33                           | 542240.0 | 587322.0 | 49                    | 438790.0 | 568390.0 | 37                        | 353070.0 | 536212.0 |
| 35                           | 542278.0 | 587260.0 |                       |          |          | 39                        | 353160.0 | 536191.0 |
| 36                           | 542207.5 | 587335.0 |                       |          |          | 42                        | 352792.0 | 536231.0 |

37 542491.1 588978.1  
40 542251.0 588767.9  
41 542330.3 588838.9  
48 540680.1 588590.0  
49 542332.5 587197.5

46 353228.0 536222.0  
47 353310.0 536470.0  
48 353698.5 536501.5

---
